# Supplementary material for: Reduced life cycle climate impact from manure through catalytic methane conversion and carbon dioxide removal
Source: Research Square preprint supplement (doi:10.21203/rs.3.rs-6328195/v1), 2025-04-22
Supplement: Supplementary file 1 [file 7d96e484a1207cf366e54bec.docx]

**Reduced life cycle climate impact from manure through catalytic methane conversion and carbon dioxide removal**

**Supplementary material**

Emma Bromarka,c *, Devesh Sathya Sri Sairam Siriginab,d, Shareq Mohd Nazirb,e, Pernilla Tidåkera,f, Åke Nordberga,g, Per-Anders Hanssona

Submitted: 2025-xx-yy

a Department of Energy and Technology, Swedish University of Agricultural Sciences, Lennart Hjelms väg 9, 756 51 Uppsala, Sweden

b Department of Chemical Engineering, KTH Royal Institute of Technology, Teknikringen 42, 11428 Stockholm, Sweden

c https://orcid.org/0000-0003-3135-8315

d https://orcid.org/0000-0002-4702-8081

e https://orcid.org/0000-0002-4056-0454

f https://orcid.org/0000-0002-4108-4680

g https://orcid.org/0000-0002-1662-9730

* Corresponding author

E-mail addresses: [emma.bromark@slu.se](mailto:emma.bromark@slu.se) , [sirigina@kth.se](mailto:sirigina@kth.se) , [smnazir@kth.se](mailto:smnazir@kth.se) , [pernilla.tidaker@slu.se](mailto:pernilla.tidaker@slu.se) , [ake.nordberg@slu.se](mailto:ake.nordberg@slu.se) , [per-anders.hansson@slu.se](mailto:per-anders.hansson@slu.se)

Table of contents

[Part A 3](#_Toc194059690)

[Background 3](#_Toc194059691)

[Additional results from the study 4](#_Toc194059692)

[Manufacturing 7](#_Toc194059693)

[Net climate impact 9](#_Toc194059694)

[Sensitivity analysis 10](#_Toc194059695)

[Best & worst case 10](#_Toc194059696)

[Part B: Process model 12](#_Toc194059697)

[Stream data 12](#_Toc194059698)

[Aspen output: Energy and material demand for the treatment process 14](#_Toc194059699)

[Dimensioning of plant 15](#_Toc194059700)

[Dimensioning of the reactor 18](#_Toc194059701)

[CO2 Capture by absorption 18](#_Toc194059702)

[References 21](#_Toc194059703)

# Part A

## Background

Methane is prevalent at a variety of concentrations. Due to the biological origin of CH4 emissions from food systems, it is often emitted over large unconfined areas and is quickly diluted in the atmosphere. The emission rate of biological sources may vary due to conditions such as moisture and temperature. In sum, the emissions are great and pose a noticeable impact on the climate. However, due to these characteristics, they may be hard to address (Abernethy et al, 2023). Hence, it is hard to give a robust answer to how high CH4 concentrations are at different emission sources, but to give some form of reference, we present conditions at some different emission sources in Table A.

Table A. Some CH4 concentrations for reference. Many measurements of CH4 emissions focus on the amounts/volume flow of CH4 and do not report concentration as the CH4 disperse quickly in the atmosphere.

| Emission source | CH4 concentration | Referencs |
| --- | --- | --- |
| Coal mine ventilation | 0.1-1%v | Ursueguia et al., 2021 |
| Liquid manure storage | 760-8400 ppmv | Melse & van der Werf, 2005 |
| Naturally ventilated stable | 15-152 ppmv | Tabase et al., 2023 |
| Biogas | 40-75%mol | Poblete et al., 2020 |
| Diluted landfill gas | 7 % | Fjelsted et al., 2020 |
| Natural gas infrastructure | 100-50,000 ppm | Jia et al., 2025 |
| Rice field | 7 ppm | Pazhanivelan et al., 2024 |
| Digestate | 200-900 ppm | Gålfalk et al., 2024 |
| Atmosphere | 1.9 ppm | NOAA, 2024 |

Figure A and Table B describe the assumptions behind the thermal catalytic treatment process and resulting CO2 flows.


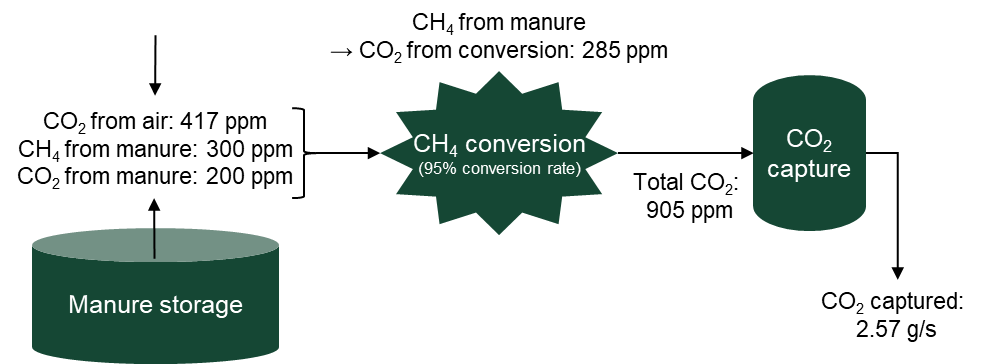


Figure A. Schematic illustration of CO2 flows with data for the 300 ppmv scenario presented in the figure.

Table B. Concentrations of GHG (ppmv) at the four studied CH4 concentrations.

| CH4 concentration | 300 | 1000 | 3000 | 10 000 |
| --- | --- | --- | --- | --- |
| CO2 from air | 417 | 417 | 417 | 417 |
| CO2 from manure | 200 | 667 | 2000 | 6667 |
| CO2 from oxidation | 285 | 950 | 2850 | 9500 |
| CO2 entering capture unit | 905 | 2034 | 5267 | 16 584 |
| CO2 captured (g/s) | 2.57 | 1.74 | 1.50 | 1.42 |

## Additional results from the study

This section presents some results that didn’t fit in the main text though the following figures:

*Figure B. The share of primary energy demand for the treatment of GHG emissions from manure storage at the four studied CH4 concentrations, divided between manufacturing (mainly raw material extraction and processing) and operation. Emissions related to end of life are included in the manufacturing as they were too small to be clearly displayed in the figure.*

*Figure C. The share of primary energy demand for running the CH4 oxidation process at the four studied CH4 concentrations. Divided over the energy using components used in the process. The contribution of the cooling pump is too small to view in the figure.*

*Figure D. The share of the additional emissions causing the positive contribution to the system climate effect at the four studied CH4 concentrations for the co-removal scenario. The GHG emissions from the system can be attributed to either the manufacturing step (mainly raw material extraction and processing), the operations phase (energy related emissions) or managing the captured CO2.*

*Figure E. Primary energy demand for producing the necessary components for the CH4 conversion process.*

*Figure F. The share of the climate effect from producing necessary components for the CH4 conversion process.*

*Figure G. The share of the climate effect from producing necessary components for the co-removal process. The absolute values for the CH4 conversion are identical to Figure F.*

*Figure H. Net climate effect for the co-removal process with subsequent CO2 capture at the four studied CH4 concentrations.*

*Figure I. Sensitivity analysis of the impact of the emissions factor for electricity on the net climate effect for co-removal at the four studied CH4 concentrations. The data labels show the relative increase/decrease compared to the main scenario (European mix).*

*Figure J. Net climate effect of CH4 conversion for the four modelled CH4 concentrations. The data labels show the relative increase/decrease compared to the main scenario (GWP100 and European mix).*

*Figure K. Net climate effect of co-removal for the four modelled CH4 concentrations. The data labels show the relative increase/decrease compared to the main scenario (GWP100 and European mix).*


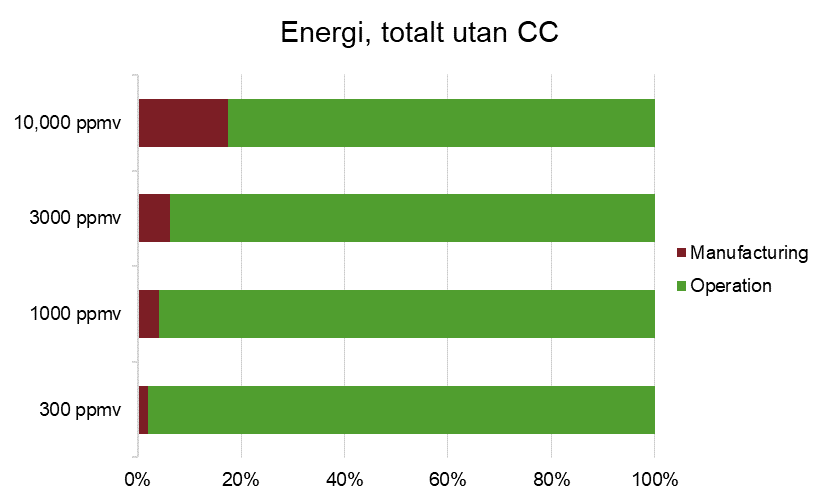


Figure B. The share of primary energy demand for the treatment of GHG emissions from manure storage at the four studied CH4 concentrations, divided between manufacturing (mainly raw material extraction and processing) and operation. Emissions related to end of life are included in the manufacturing as they were too small to be clearly displayed in the figure.


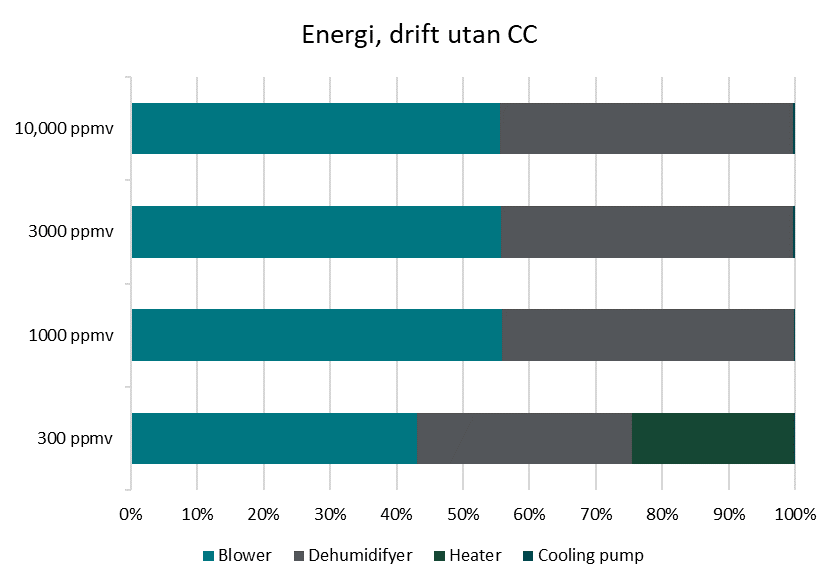


Figure C. The share of primary energy demand for running the CH4 oxidation process at the four studied CH4 concentrations. Divided over the energy using components used in the process. The contribution of the cooling pump is too small to view in the figure.


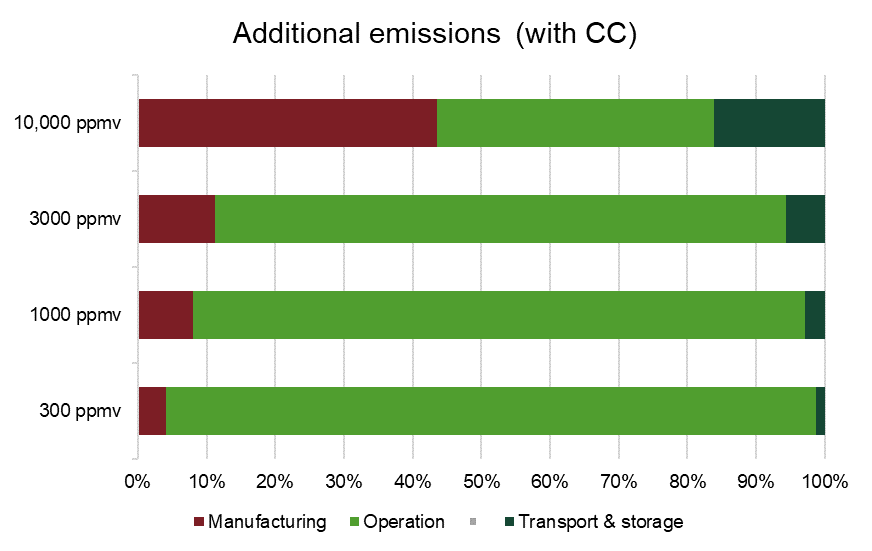


Figure D. The share of the additional emissions causing the positive contribution to the system climate effect at the four studied CH4 concentrations for the co-removal scenario. The GHG emissions from the system can be attributed to either the manufacturing step (mainly raw material extraction and processing), the operations phase (energy related emissions) or managing the captured CO2.

### Manufacturing

At the lowest concentrations, additional heat was required to reach a high enough temperature for oxidation to initiate, but at 1000 ppmv CH4 and above, the heat transfer in the recuperator is sufficient to sustain the reaction.


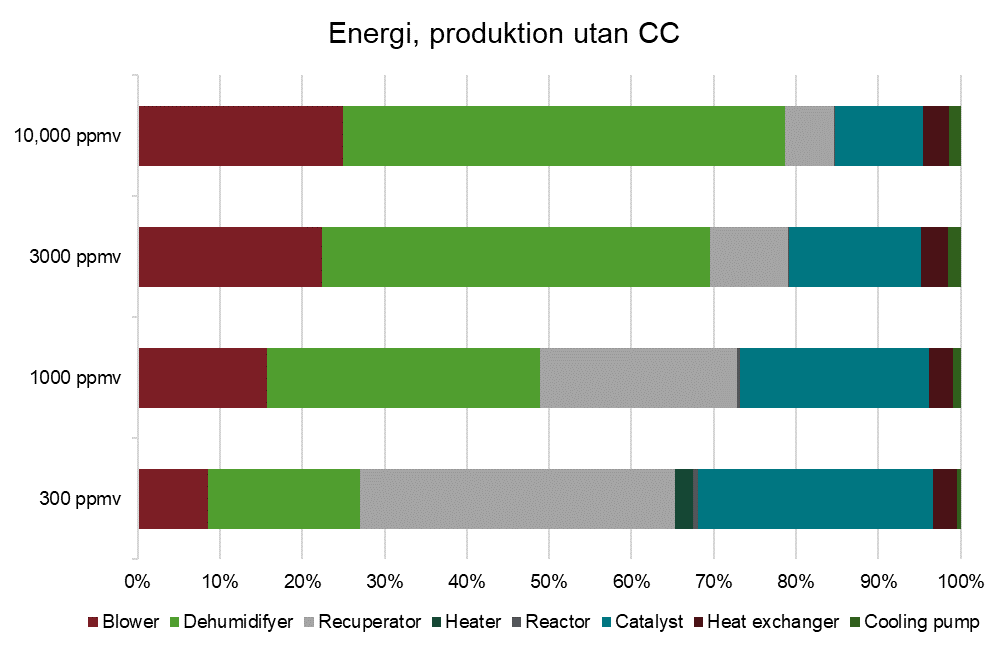


Figure E. Primary energy demand for producing the necessary components for the CH4 conversion process.


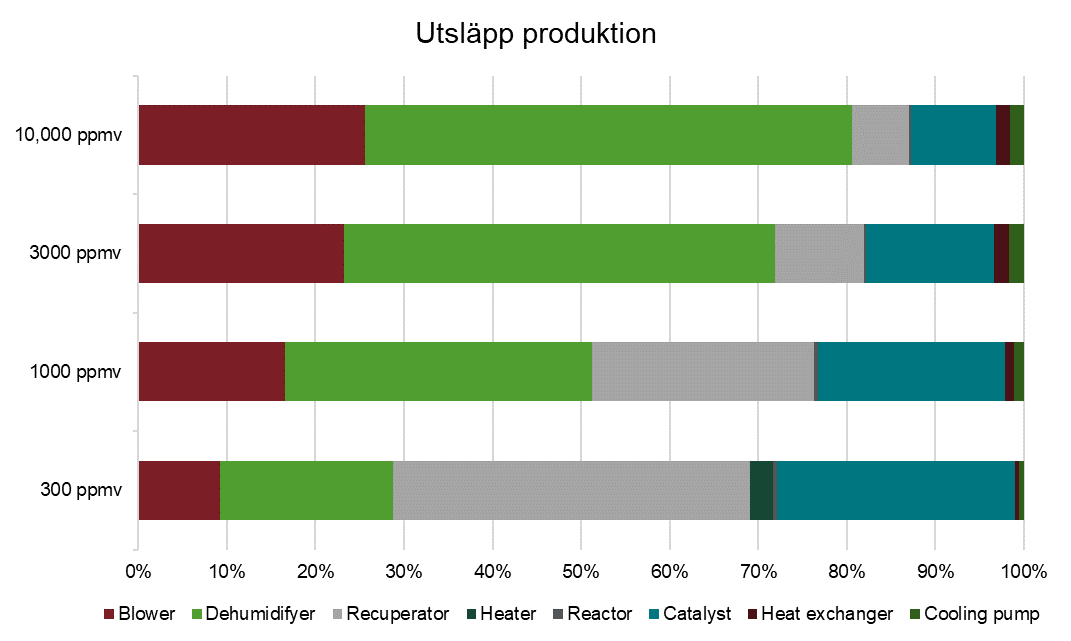


Figure F. The share of the climate effect from producing necessary components for the CH4 conversion process.

The impact of the carbon capture unit is largely due to the sorbent (Figure G).


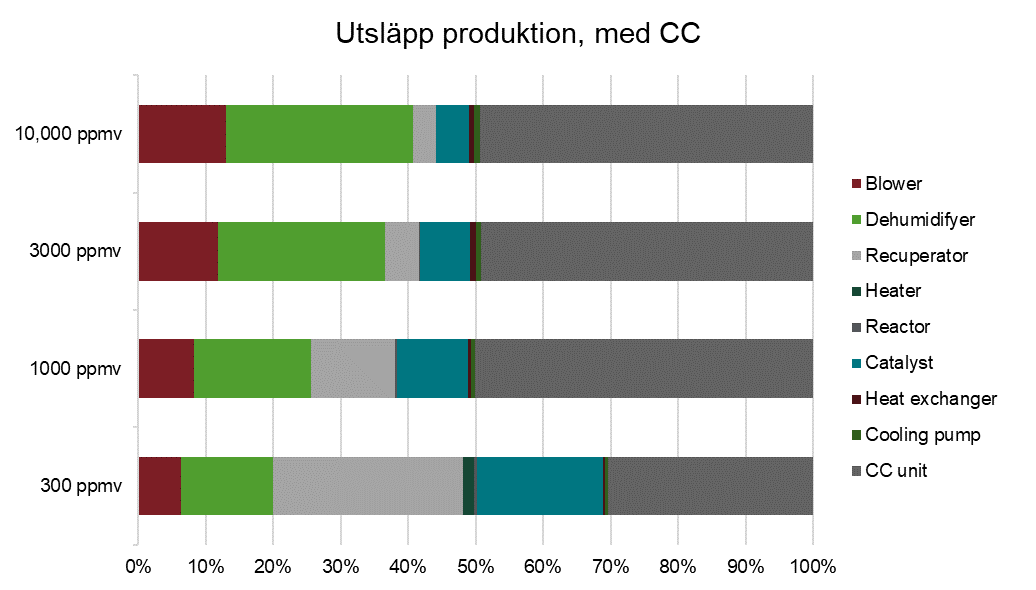


Figure G. The share of the climate effect from producing necessary components for the co-removal process. The absolute values for the CH4 conversion are identical to Figure F.

### Net climate impact


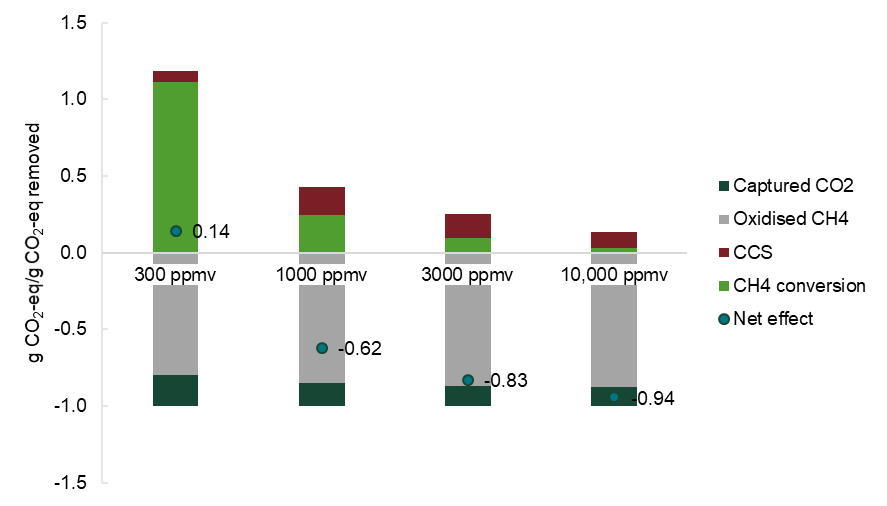


Figure H. Net climate effect for the co-removal process with subsequent CO2 capture at the four studied CH4 concentrations.

### Sensitivity analysis

This section presents the same sensitivity analysis as was presented in the article text but for the co-removal scenario.


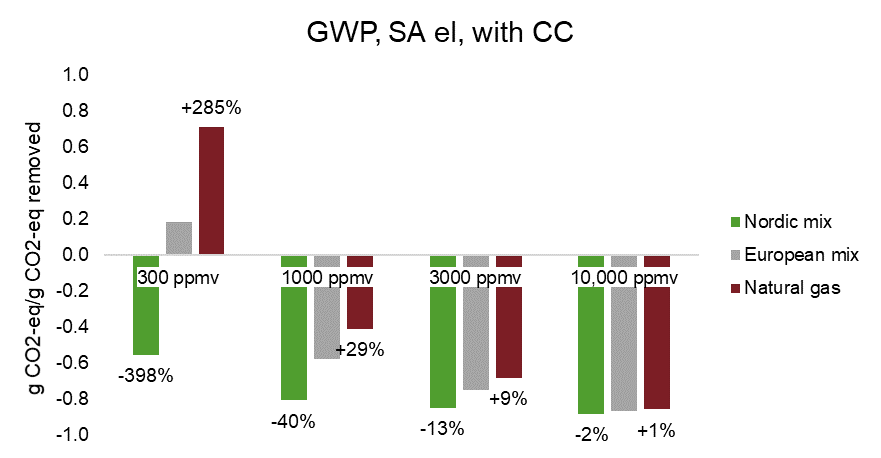


Figure I. Sensitivity analysis of the impact of the emissions factor for electricity on the net climate effect for co-removal at the four studied CH4 concentrations. The data labels show the relative increase/decrease compared to the main scenario (European mix).

### Best & worst case

To show the full range of possible results, we put together scenarios which give the maximum and minimum net climate effect. “Best” and “worst” refers to the quantitative value and does not reflect any qualitative valuation of the authors.

The “best case” scenario is a combination of GWP20 and Nordic electricity mix.

The “worst case” scenario is a combination of GWP500 and natural gas power.


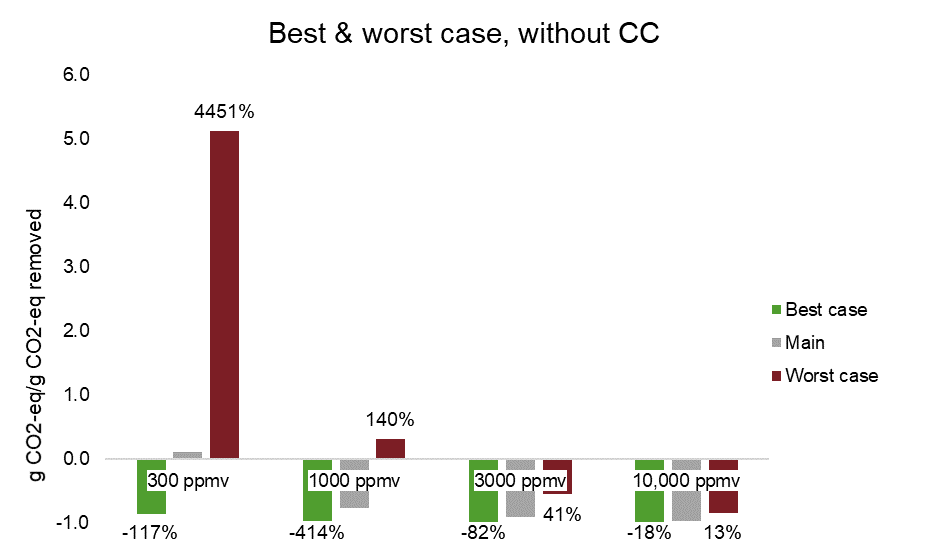


Figure J. Net climate effect of CH4 conversion for the four modelled CH4 concentrations. The data labels show the relative increase/decrease compared to the main scenario (GWP100 and European mix).


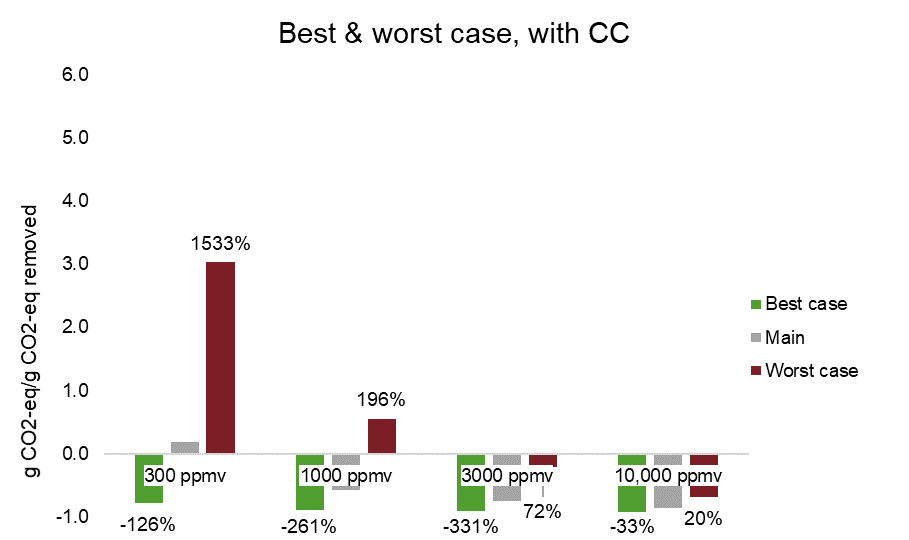


Figure K. Net climate effect of co-removal for the four modelled CH4 concentrations. The data labels show the relative increase/decrease compared to the main scenario (GWP100 and European mix).

# Part B: Process model

The following modifications were made to the process model for CH4 conversion presented in Sirigina et al. (2023)

- The gas compositions and the volumetric flow rates corresponding to the three scenarios were considered.
- The conversion of CH4 in the reactor was set to 95%.
- Adiabatic conditions were assumed in the reactor.
- a MEA based absorption process for CO2 capture was considered for higher CO2 concentrations in contrast to amine-based adsorption at lower CO2 concentrations.


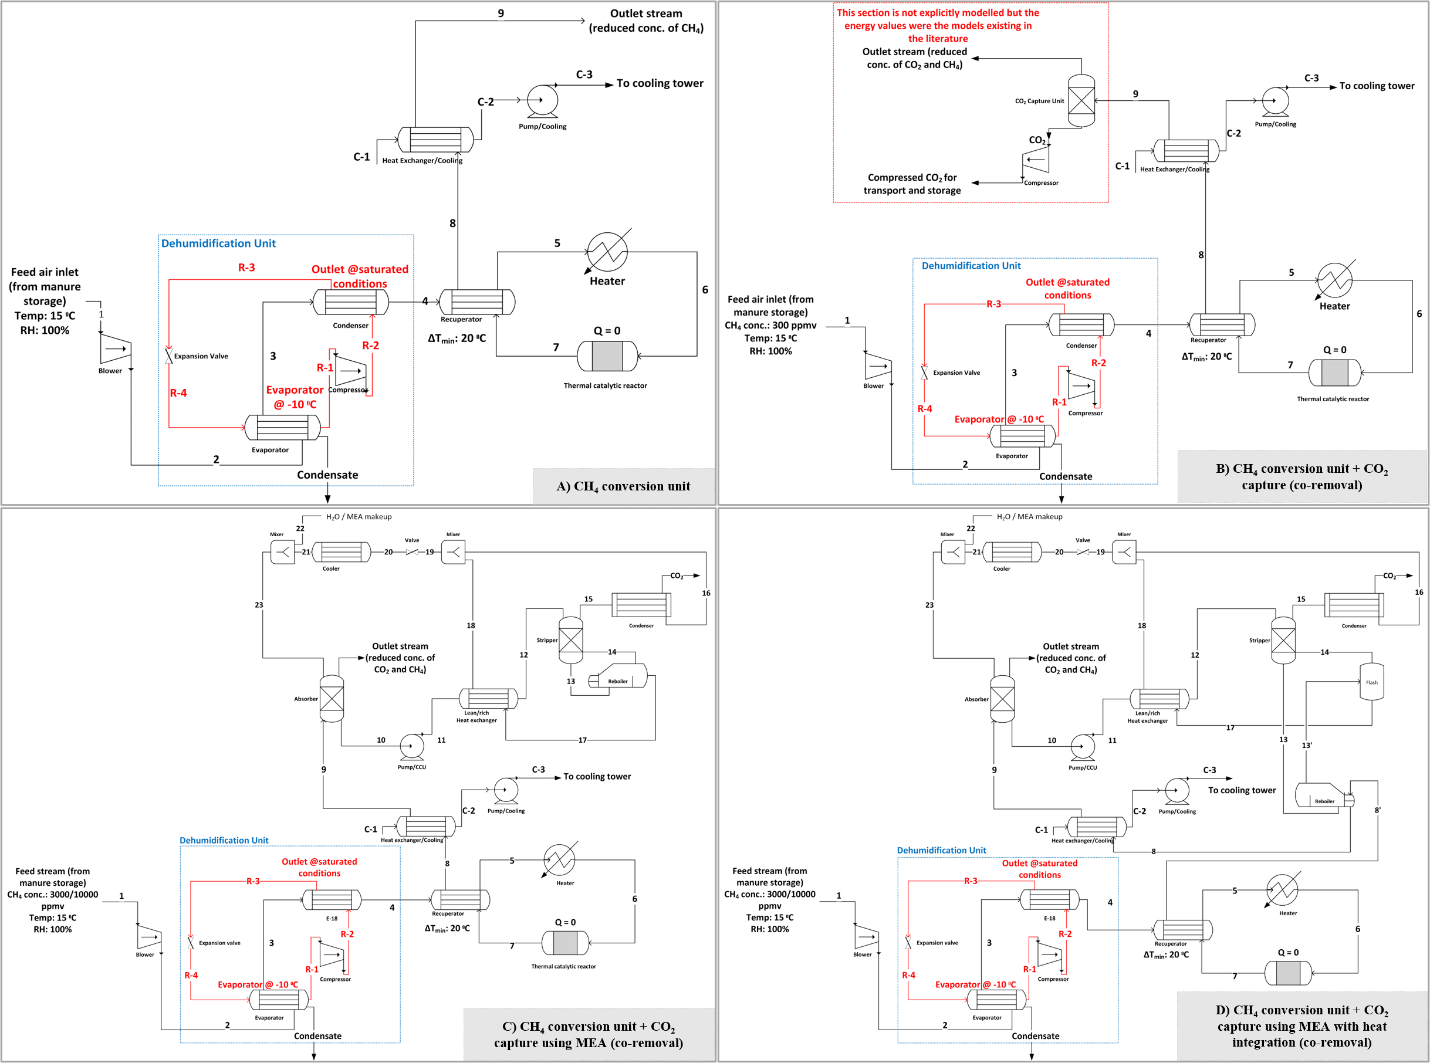


Figure L. Process schematics for different cases considered in this study: A) CH4 conversion unit, B) CH4 Conversion unit with CO2 capture for the case with 300 ppmv inlet CH4 concentration (co-removal), C) CH4 conversion with CO2 capture using MEA absorption (co-removal) for 3000 ppmv, and 10,000 ppmv CH4 concentrations, and D) Includes heat integration between CH4 conversion and CO2 capture for cases with 3000 ppmv and 10,000 ppmv CH4 concentrations.

## Stream data

*Table C. Stream data at process boundaries for the case with 300 ppmv CH4 concentration (adapted from Sirigina et al., 2023)*

| Boundary Stream | Volumetric flow (cum/hr) | Mass flow (kg/hr) | Temperature (K) | Pressure (bar) | CO2 mol% | CH4 mol% | H2O mol% | Rem. mol% |
| --- | --- | --- | --- | --- | --- | --- | --- | --- |
| 1 | 6890.00 | 8384.03 | 288.15 | 1.01 | 0.06 | 0.03 | 1.01 | 98.89 |
| Condensate | 0.02 | 25.35 | 274.15 | 1.24 | 0.00 | 0.00 | 100.00 | 0.00 |
| 9 | 6627.29 | 8358.68 | 293.15 | 1.07 | 0.09 | 0.00 | 0.59 | 99.32 |

Table D. Stream data at process boundaries for the case with 1000 ppmv CH4 concentration

| Boundary Stream | Volumetric flow (cum/hr) | Mass flow (kg/hr) | Temperature (K) | Pressure (bar) | CO2 mol% | CH4 mol% | H2O mol% | Rem. mol% |
| --- | --- | --- | --- | --- | --- | --- | --- | --- |
| 1 | 2067.00 | 2514.69 | 288.15 | 1.01 | 0.11 | 0.10 | 1.02 | 98.78 |
| Condensate | 0.01 | 7.45 | 274.15 | 1.22 | 0.00 | 0.00 | 100.00 | 0.00 |
| 9 | 1988.42 | 2507.35 | 293.15 | 1.07 | 0.20 | 0.01 | 0.74 | 99.05 |

*Table E. Stream data at process boundaries for the case with 3000 ppmv CH4 concentration*

| Boundary Stream | Volumetric flow (cum/hr) | Mass flow (kg/hr) | Temperature (K) | Pressure (bar) | CO2 mol% | CH4 mol% | H2O mol% | Rem. mol% |
| --- | --- | --- | --- | --- | --- | --- | --- | --- |
| 1 | 689.00 | 838.16 | 288.15 | 1.01 | 0.24 | 0.30 | 1.01 | 98.44 |
| Condensate | 0.00 | 2.46 | 274.15 | 1.22 | 0.00 | 0.00 | 100.00 | 0.00 |
| Outlet stream | 720.07 | 839.64 | 298.423 | 1.01 | 0.09 | 0.01 | 2.91 | 96.99 |
| CO2 | 1.77 | 5.71 | 308.15 | 1.90 | 96.80 | 0.00 | 3.03 | 0.18 |
| H2O/MEA Makeup | 0.01 | 9.64 | 300 | 1.03 | 0.00 | 0.00 | 99.96 | 0.04 |

*Table F. Stream data at process boundaries for the case with 10,000 ppmv CH4 concentration*

| Boundary Stream | Volumetric flow (cum/hr) | Mass flow (kg/hr) | Temperature (K) | Pressure (bar) | CO2 mol% | CH4 mol% | H2O mol% | Rem. mol% |
| --- | --- | --- | --- | --- | --- | --- | --- | --- |
| 1 | 207.00 | 251.64 | 288.15 | 1.01 | 0.71 | 1.00 | 1.03 | 97.27 |
| Condensate | 0.00 | 0.76 | 274.15 | 1.22 | 0.00 | 0.00 | 100.00 | 0.00 |
| Outlet stream | 228.64 | 252.43 | 313.91 | 1.03 | 0.18 | 0.05 | 6.85 | 92.93 |
| CO2 | 1.76 | 5.87 | 308.15 | 1.96 | 96.99 | 0.00 | 2.95 | 0.07 |
| H2O/MEA Makeup | 0.01 | 7.00 | 313.50 | 1.03 | 0.00 | 0.00 | 100.00 | 0.00 |

*Table G. The heat transfer coefficient and material data used in the CH4 conversion unit.*

| Equipment | Heat transfer coefficient (W / m2 K) | Material |
| --- | --- | --- |
| Evaporator | 138 | 304 Stainless steel |
| Condenser | 122 (Condensing refrigerant / Vapor)  30 (Vapor refrigerant /Vapor) | 304 Stainless steel |
| Recuperator | 30 | 304 Stainless steel |
| Heat exchanger – Cooling | 170 | 304 Stainless steel |

*Table H. The heat transfer coefficient and material data used in the CO2 Capture unit (only for the 3000 ppmv and 10,000 ppmv CH4 cases)*

| Equipment | Heat transfer coefficient (W / m2 K) | Material |
| --- | --- | --- |
| Rich-lean heat exchanger | 500 | 316 Stainless steel |
| Cooler | 204 | 316 Stainless steel |
| Reboiler (for heat integration between CH4 conversion and CO2 capture) | 100 | 316 Stainless steel |

## Aspen output: Energy and material demand for the treatment process

The results of energy demand for the three scenarios are presented in Table I. The presented data includes both methane conversion and co-removal (of methane and carbon dioxide) for the scenarios.

The energy demand presented in the table includes process heat integration between the CH4 conversion and CO2 capture units. The specific reboiler duty is 7.3 GJ/t-CO2 for the 10,000 ppmv CH4 case and 8.3 GJ/t-CO2 for the 3000 ppmv CH4 case. The heat integration is maximum at a 10,000 ppmv CH4 concentration with all the energy requirements of the reboiler being met by waste heat from CH4 conversion. Around 18% of reboiler duty was met by waste heat from the CH4 conversion unit for the case with 3000 ppmv of CH4 concentration. Heat integration was not possible for the cases with 300 ppmv and 1000 ppmv due to the low quality of the waste heat stream from the CH4 conversion unit.

Table I. Energy demand (GJ/tonne CO­2-eq mitigated) for the three manure storage scenarios. The energy demand for 3000 ppmv and 10,000 ppmv CH4 concentrations includes process heat integration. CH4 conversion is denoted as Scenario A and Co-removal as Scenario B to decrease cluttering due to limited space.

| Concentration | 300 ppmv | | | 1000 ppmv | | | 3000 ppmv | | | 10,000 ppmv | | |
| --- | --- | --- | --- | --- | --- | --- | --- | --- | --- | --- | --- | --- |
| Scenario | **A** | **B** | **A** | | **B** | **A** | | **B** | **A** | | **B** |
| Blower | 6.04 | 4.49 | 1.64 | | 1.33 | 0.55 | | 0.47 | 0.16 | | 0.14 |
| Dehumidifier | 4.56 | 3.39 | 1.30 | | 1.05 | 0.43 | | 0.37 | 0.13 | | 0.11 |
| Heater | 3.42 | 2.55 | 0.00 | | 0.00 | 0.00 | | 0.00 | 0.00 | | 0.00 |
| Cooler Pump | 0.02 | 0.01 | 0.01 | | 0.00 | 0.00 | | 0.00 | 0.00 | | 0.00 |
| CO2 Capture Unit | - | 2.83 | - | | 2.08 | - | | 1.01 | - | | 0.04 |
| Total | **14.03** | **13.27** | **2.94** | | **4.47** | **0.98** | | **1.85** | **0.30** | | **0.30** |

The material requirement for CH4 conversion and CO2 capture is shown in Table K. As described above, the CO2 capture technology differs with inlet CH4 concentration; an adsorption-based capture technology was considered for 300 ppmv, whereas an absorption-based process was considered for 3000 ppmv and 1% inlet CH4 concentrations. The catalyst estimation for CH4 conversion was based on the kinetic model presented in Alyani and Smith (2016). The catalyst amount was obtained assuming 95% conversion in the reactor. The amount of adsorbent for CO2 capture at 300 ppmv was based on data presented in Sabatino et al. (2021). For CO2 capture by MEA absorption, the makeup corresponding to the loss of MEA through the gas stream from the top of absorber is presented.

Table J. Material requirements for CH4 conversion and CO2 capture.

| Material | 300 ppmv | | 1000 ppmv | | 3000 ppmv | | 10 000 ppmv | |
| --- | --- | --- | --- | --- | --- | --- | --- | --- |
| Catalyst for CH4 conversion  (6.5 wt% Pd/Al2O3) | 46755 g | 16064 g | | 7098 g | | 3966 g | |
| Adsorbent/absorbent  for CO2 capture | 47124 g | 31843 g | | 11 g/hr | | 8.4 g/hr | |

## Dimensioning of plant

Process components were sized automatically in Aspen Plus in accordance with the following tables.

Table K. Sizing of equipment from the process model for the case with 300 ppm CH4.

| Unit | Specification (kW) | Equipment Weight** (kg) | Installed weight*** (kg) | Other installations |
| --- | --- | --- | --- | --- |
| Inlet blower (Capacity) | 56.47 | 3632.00 | 12794.17 | 9162.17 |
| Dehumidifier - Evaporator (Duty) | 107.35 | 908.00 | 2891.98 | 1983.98 |
| Dehumidifier - Condenser (Duty) | 149.96 | 1816.00 | 4436.03 | 2620.03 |
| Dehumidifier - Compressor (Capacity) | 42.62 | 6174.40 | 11474.40 | 5300.00 |
| Recuperator - Heat exchanger (Duty) | 606.67 | 19295.00 | 32031.52 | 12736.52 |
| Heater (Duty) | 32.02 | 444.92 | 7387.03 | 6942.11 |
| Reactor (Volume of reactor*) | 0.03 | 251.37 | 402.19 | 150.82 |
| Cooler - Heat exchanger (Duty) | 155.62 | 1180.40 | 4434.22 | 3253.82 |
| Pump (capacity) | 0.16 | 81.72 | 1559.04 | 1477.32 |
| Sum | 1150.87 | 33783.81 | 77410.58 | 43626.77 |

Table L. Sizing of equipment from the process model for the case with 1000 ppm CH4.

| Unit | Specification (kW) | Equipment Weight** (kg) | Installed weight*** (kg) | Other installations |
| --- | --- | --- | --- | --- |
| Inlet blower (Capacity) | 15 | 2905.6 | 9711 | 6805 |
| Dehumidifier - Evaporator (Duty) | 31 | 354 | 1904 | 1550 |
| Dehumidifier - Condenser (Duty) | 43 | 636 | 2621 | 1986 |
| Dehumidifier - Compressor (Capacity) | 12 | 5766 | 10865 | 5099 |
| Recuperator - Heat exchanger (Duty) | 194 | 4767 | 11940 | 7173 |
| Heater (Duty) | 0 | 0 | 0 | 0 |
| Reactor (Volume of reactor*) | 0.0108 | 80 | 128 | 48 |
| Cooler - Heat exchanger (Duty) | 48 | 400 | 2788 | 2388 |
| Pump (capacity) | 0.05 | 77 | 1422 | 1345 |
| Sum | 342 | 14985 | 41378 | 26394 |

Table M. Sizing of equipment from the process model for the case with 3000 ppm CH4.

| Unit | Specification (kW) | Equipment Weight** (kg) | Installed weight*** (kg) | Other installations |
| --- | --- | --- | --- | --- |
| Inlet blower (Capacity) | 5 | 2679 | 8360 | 5681.36 |
| Dehumidifier - Evaporator (Duty) | 10 | 213 | 1597 | 1383.34 |
| Dehumidifier - Condenser (Duty) | 14 | 277 | 1835 | 1557.67 |
| Dehumidifier - Compressor (Capacity) | 4 | 5584 | 10583 | 4998.99 |
| Recuperator - Heat exchanger (Duty) | 65 | 1044 | 8225 | 7180.46 |
| Heater (Duty) | 0 | 0 | 0 | 0.00 |
| Reactor (Volume of reactor*) | 0.00 | 38 | 61 | 22.90 |
| Cooler - Heat exchanger (Duty) | 28 | 232 | 2531 | 2299.51 |
| Pump (capacity) | 0.03 | 77 | 1111 | 1034.21 |
| Sum | 126.64 | 10144.20 | 34302.65 | 24158.44 |
| CCU - Absorber | - | 7264.00 | 11890.71 | 4627 |
| CCU - Stripper | - | 2406.20 | 6595.71 | 4190 |
| CCU - Rich/lean Heat Exchanger | 44.25 | 222.46 | 1497.75 | 1275 |
| CCU - Stripper Reboiler flash vessel | 13.00 | 862.60 | 4554.98 | 3692 |
| CCU - Stripper Condenser flash vessel | - | 862.60 | 4471.90 | 3609 |
| CCU - Cooler | 0.40 | 81.72 | 883.48 | 802 |
| CCU - Pump | 0.01 | 77.18 | 760.45 | 683 |

Table N. Sizing of equipment from the process model for the case with 10,000 ppm CH4, the largest concentration requiring the smallest plant.

| Unit | Specification (kW) | Equipment Weight** (kg) | Installed weight*** (kg) | Other installations |
| --- | --- | --- | --- | --- |
| Inlet blower (Capacity) | 2 | 2588 | 6973 | 4385 |
| Dehumidifier - Evaporator (Duty) | 3 | 132 | 1270 | 1139 |
| Dehumidifier - Condenser (Duty) | 4 | 204 | 1595 | 1391 |
| Dehumidifier - Compressor (Capacity) | 1 | 5448 | 10319 | 4871 |
| Recuperator - Heat exchanger (Duty) | 20 | 209 | 4912 | 4703 |
| Heater (Duty) | 0 | 0 | 0 | 0 |
| Reactor (Volume of reactor*) | 0.00 | 21 | 34 | 13 |
| Cooler - Heat exchanger (Duty) | 21 | 182 | 2396 | 2214 |
| Pump (capacity) | 0.02 | 77 | 1111 | 1034 |
| Sum | 51.21 | 8860.38 | 28610.12 | 19749.74 |
| CCU - Absorber | - | 4358 | 8897 | 4539 |
| CCU - Stripper | - | 3042 | 7328 | 4287 |
| CCU - Stripper Reboiler - HX | 11.80 | 132 | 2492 |  |
| CCU - Rich/lean Heat Exchanger | - | 132 | 1180 | 1048 |
| CCU - Stripper Reboiler flash vessel | 0.00 | 863 | 4493 | 3631 |
| CCU - Stripper Condenser flash vessel | - | 863 | 4305 | 3443 |
| CCU - Cooler | - | 132 | 947 | 815 |
| CCU - Pump | 0.02 | 77.18 | 932.06 | 854.88 |

3000 & 10,000 ppm are high enough concentrations of CH4 that the amount of heat released from the CH4 oxidation gives a temperature high enough for the catalyst to operate without preheating.

## Dimensioning of the reactor

The design of the reactor under adiabatic conditions is carried out by considering the reactor as a pressure vessel. The minimum wall thicknesses under the design conditions for 3 cases were estimated using the design equations presented in Table 12-10 by Peter et al. (2003). With an outer diameter of 0.0508 m, the inner diameter is estimated to be 0.0194 m. Considering a tube length of 3 m for the case with a 1% vol CH4 concentration, the amount of stainless steel 304 required for the pressure vessel was estimated. The density of the stainless steel 304 was considered to be 8000 kg/m3. For the case with 3000 ppmv of CH4 concentration, the same diameter values were assumed with a tube length of 4.1 m. The weight of two heads and nozzles was not factored into the calculation because it is observed that the weight of the reactor is insignificant compared to other process equipment.

## CO2 Capture by absorption

The CO2 capture for the cases with 3000 ppmv and 10,000 ppmv CH4 was considered through monoethanolamine (MEA) absorption. The modelling of CO2 capture done by aqueous MEA solution was carried out in Aspen Plus. The CO2 capture model was then coupled to the CH4 conversion unit. MEA absorption is well studied and among the most common technologies for post combustion CO2 capture (Wang *et al.* 2023, Madeddu *et al.* 2018). However, the technology was not well researched for CO2 capture from ambient air. Kiani et al. (2020) presented a study on the application of MEA absorption for the CO2 capture from ambient air. For the base case design (with a 50% capture rate), the reboiler duty and total electricity consumption were reported as 10.7 GJ/tCO2 and 1.452 MWh/tCO2. Although the energy demand at lower capture rates was reported to be low, a higher capital cost was reported due to the need for processing large amounts of air, suggesting the use of an alternative design for the absorber. In a comparative assessment of different direct air capture technologies, Sabatino et al. (2021) reported reboiler duty for CO2 capture by MEA absorption to be between 18.01 GJ/tCO2 and 48.16 GJ/tCO2 for the cases with minimum energy demand and maximum productivity, respectively. Both studies reveal a greater requirement of low-grade heat at higher CO2 capture rates. Therefore, in the current study, for the case with the lowest CH4 concentrations (resulting in a low CO2 concentration to the capture unit), CO2 capture using a solid sorbent technology with a much lower energy demand was considered. However, for the other cases with higher CH4 concentrations (resulting in a higher CO2 concentration to the capture unit), CO2 capture by MEA absorption was considered.

The modelling of CO2 capture in aqueous MEA solution was carried out following the standard process design for MEA absorption processes in post combustion CO2 capture. The inlet flue stream with CO2 flows countercurrent to the lean solution and CO2 is chemically absorbed into the solution. The CO2 rich stream from the bottom of the absorber is pumped to the stripper pressure and is later heated in the lean-rich heat exchanger. The rich solution is stripped of CO2 in the stripper unit and the hot lean solution flows through the lean-rich heat exchanger, exchanging heat with the cold rich stream from the absorber. The cold lean solution flows to the top of the absorber, completing the cycle. The gaseous stream from the top of stripper is sent to the condenser, where the water present in the stream is condensed. The concentrated CO2 stream from the condenser is sent for compression for further transport and permanent storage. The values for compression, transport, and storage were taken from the literature. The process schematics for CO2 capture by MEA absorption integrated to CH4 conversion is shown in Figure L. A rate-based model for CO2 capture was developed in Aspen Plus to simulate the absorption process. The property evaluation was based on the ENTRL method present in Aspen Plus v12. Absorption and stripping were simulated using RadFrac models present in Aspen Plus. A structured packing type, Sulzer Mellapak 252 Y, was chosen as the packing type for both the columns. The correlations to estimate parameters corresponding to material and energy transfer for the packing type are readily available in Aspen Plus. The values for the rate-based model setup in Aspen Plus were obtained from Madeddu et al. (2018). The main assumptions behind the model are shown in Table O. The modelling of CO2 capture and its integration with the CH4 conversion unit was performed separately for both the cases because of differences in concentrations, flow rates, and configuration. Complete heat integration was possible in the case with 10,000 ppmv CH4 concentration, with the waste heat from CH4 conversion unit utilized in the reboiler for CO2 regeneration. In the case with 3000 ppmv of CH4 concentration, about 18% of waste heat from CH4 conversion could be utilized in the reboiler.

Table O. Modelling assumptions and results of CO2 capture by MEA absorption for the case with 10,000 ppmv CH4 concentration.

|  | Parameter | Value |
| --- | --- | --- |
| Inlet CO2 | Volume fraction | 1.7% |
| Lean solvent characterization | Temperature | 313.5 K |
| Pressure | 1 atm |
| CO2 loading (CO2 mole fraction / MEA mole fraction) | 0.3 |
| Absorber | Stages | 20 |
| Height | 9 m |
| Diameter | 0.25 m |
| Stripper | Pressure | 1.96 bar |
| Stages | 15 |
| Height | 3 m |
| Diameter (max.) | 0.077 m |
| Reboiler | Temperature | 393 K |
| Duty | 11.8 kW |
| Condenser | Temperature | 308.15 K |
| Lean-rich heat exchanger | ∆Tmin | 10 K |
| Performance | CO2 capture rate | 89% |
| CO2 purity | 97% |

Table P. Modelling assumptions and results of CO2 capture by MEA absorption for the case with 3000 ppmv CH4 concentration.

|  | Parameter | Value |
| --- | --- | --- |
| Inlet CO2 | Volume fraction | 5290 ppmv |
| Lean solvent characterization | Temperature | 300 K |
| Pressure | ~1 atm |
| CO2 loading (CO2 mole fraction / MEA mole fraction) | 0.281 |
| Absorber | Stages | 20 |
| Height | 11 m |
| Diameter | 0.27 m |
| Stripper | Pressure | 1.9 bar |
| Stages | 20 |
| Height | 3 m |
| Diameter | 0.089 m |
| Reboiler | Temperature | 394 K |
| Duty | 13 kW |
| Condenser | Temperature | 308.15 K |
| Lean-rich heat exchanger | ∆Tmin | 10 K |
| Performance | CO2 capture rate | 83% |
| CO2 purity | 97% |

For the 3000 ppmv CH4 concentration case, it is observed that about 18% of reboiler energy demand was met using the thermal energy from the CH4 conversion unit.

# References

Abernethy, S., Kessler, M.I. & Jackson, R.B. (2023). Assessing the potential benefits of methane oxidation technologies using a concentration-based framework. *Environmental Research Letters,* 18(9), 094064. h<ttps://doi.org/10.1088/1748-9326/acf603>

Fjelsted, L., Scheutz, C., Christensen, A.G., Larsen J.E., Kjeldsen, P. (2020). Biofiltration of diluted landfill gas in an active loaded open-bed compost filter. *Waste management 103 ,* 1-11<https://doi.org/10.1016/j.wasman.2019.12.005>

Gålfalk, M., Nilsson Påledal, S., Yngvesson, J., & Bastviken, D. (2024). Measurements of Methane Emissions from a Biofertilizer Storage Tank Using Ground-Based Hyperspectral Imaging and Flux. Environmental Science & Technology, 58(8), 3766-3775. <https://doi.org/10.1021/acs.est.3c06810>

Kiani, A., Jiang, K., & Feron, P. (2020). Techno-Economic Assessment for CO2 Capture From Air Using a Conventional Liquid-Based Absorption Process [Original Research]. *Frontiers in Energy Research*, *8*. <https://doi.org/10.3389/fenrg.2020.00092>

Jia, W., Jia, P., Gu, L., Ren, L., Zhang, Y., Chen, H., Wu, X., Feng, W., Cai, J. (2025). Quantification of methane emissions from typical natural gas stations using on-site measurement technology. *Journal of Pipeline Science and Engineering, 5*(2), 100229. <https://doi.org/10.1016/j.jpse.2024.100229>

Madeddu, C., Errico, M., & Baratti, R. (2018). *CO2 capture by reactive absorption-stripping: modeling, analysis and design*. Springer.

Melse, R. W., & van der Werf, A. W. (2005). Biofiltration for Mitigation of Methane Emission from Animal Husbandry. Environmental Science & Technology, 39 (14), 5460-5468 <https://doi.org/10.1021/es048048q>

NOAA. (2024). *Trends in Atmospheric Methane (CH4).* National Oceanic & Atmospheric Administration Global Monitoring Laboratory. <https://gml.noaa.gov/ccgg/trends_ch4/> (Accessed: 2025-03-01)

Pazhanivelan, S., Sudarmanian, N. S., Geethalakshmi, V., Deiveegan, M., Ragunath, K., Sivamurugan, A. P., & Shanmugapriya, P. (2024). Assessing Methane Emissions from Rice Fields in Large Irrigation Projects Using Satellite-Derived Land Surface Temperature and Agronomic Flooding: A Spatial Analysis. *Agriculture*, *14*(3), 496. <https://doi.org/10.3390/agriculture14030496>

Poblete, I.B.S., Araujo, O.d.Q.F. & de Medeiros, J.L. (2020). Dynamic analysis of 804 sustainable biogas-combined-cycle plant: Time-varying demand and 805 bioenergy with carbon capture and storage. *Renewable and Sustainable* 806 *Energy Reviews,* 131. <https://doi.org/10.1016/j.rser.2020.109997>

Sabatino, F., Grimm, A., Gallucci, F., van Sint Annaland, M., Kramer, G. J., & Gazzani, M. (2021). A comparative energy and costs assessment and optimization for direct air capture technologies. *Joule*, *5*(8), 2047-2076. <https://doi.org/10.1016/j.joule.2021.05.023>

Sirigina, D.S.S.S., Goel, A. & Nazir, S.M. (2023). Process concepts and analysis for co-removing methane and carbon dioxide from the atmosphere. *Scientific Reports,* 13(1), 17290. <https://doi.org/10.1038/s41598-023-44582-w>

Tabase, R.K., Næss, G., Larring, Y. (2023). Ammonia and methane emissions from small herd cattle buildings in a cold climate. *Science of the total environment, 903*, 166046

Ursueguía, D., Marín, P, Díaz, E., Ordóñez, S. (2021) A new strategy for upgrading ventilation air methane emissions combining adsorption and combustion in a lean-gas turbine.  *Journal of Natural Gas Science and Engineering*, *88*, 103808

Wang, M., Lawal, A., Stephenson, P., Sidders, J., & Ramshaw, C. (2011). Post-combustion CO2 capture with chemical absorption: A state-of-the-art review. *Chemical Engineering Research and Design*, *89*(9), 1609-1624. [https://doi.org/10.1016/j.cherd.2010.11.005](https://doi.org/https://doi.org/10.1016/j.cherd.2010.11.005)
